## **Intraglottal aerodynamic pressure and energy transfer in a self-oscillating synthetic model of the vocal folds**

Mohsen Motie-Shirazi,<sup>1</sup> Matías Zañartu,<sup>2</sup> Sean D. Peterson,<sup>3</sup> and Byron D. Erath<sup>1, a</sup>

<sup>1</sup>*Department of Mechanical and Aeronautical Engineering, Clarkson University, Potsdam, NY, USA*

<sup>2</sup>*Department of Electronic Engineering, Universidad Técnica Federico Santa María, Valparaíso, Chile*

<sup>3</sup>*Department of Mechanical and Mechatronics Engineering, University of Waterloo, Waterloo, ON, CA*

(Dated: 22 October 2020)

1 Self-sustained oscillations of the vocal folds during phonation are the result of the  
2 energy exchange between the airflow and the vocal fold tissue. Understanding this  
3 mechanism requires accurate investigation of the aerodynamic pressures acting on  
4 the vocal fold surface during oscillation. A self-oscillating silicone vocal fold model  
5 was used in a hemilaryngeal flow facility to measure the time-varying pressure dis-  
6 tribution along the inferior-superior length of the vocal fold with a spatial resolution  
7 of 0.254 mm, and at four discrete locations in the anterior-posterior direction. It was  
8 found that the intraglottal pressures during the opening and closing phases of the vo-  
9 cal fold are highly dependent on three-dimensional and unsteady flow behaviors. The  
10 measured aerodynamic pressures and estimates of the medial surface velocity were  
11 used to compute the intraglottal energy transfer from the airflow to the vocal folds.  
12 The energy was greatest at the anterior-posterior midline, and decreased significantly  
13 toward the anterior/posterior endpoints. The net energy transfer over an oscillation  
14 cycle was positive, consistent with the theory of energy exchange during phonation.  
15 The findings provide insight into the dynamics of the vocal fold oscillation and the  
16 potential causes of some vocal fold disorders.

17 Keywords: Intraglottal aerodynamics; Aerodynamic pressure; Aerodynamic en-  
18 ergy; Synthetic vocal fold model

---

<sup>a</sup>[berath@clarkson.edu](mailto:berath@clarkson.edu)

## 19 I. INTRODUCTION

20 Self-sustained oscillations of the vocal folds (VFs) are the result of coupling between the  
21 aerodynamic energy that is transferred to the VFs by the air being forced between them, the  
22 biomechanical structure of the VFs, and the acoustic loading of the vocal tract<sup>1</sup>. The rate  
23 of energy transfer from the fluid to the VF tissue is correlated with the pressure and velocity  
24 fields within the glottis (i.e., the opening between the VFs)<sup>2,3</sup>. Because the glottis forms a  
25 time-varying orifice during phonation, high-fidelity temporal and spatial resolution of the  
26 intraglottal pressure and velocity is needed to elucidate the physics of VF oscillation<sup>4,5</sup>.

27 Glottal velocity fields have been widely studied using static and dynamic VF models<sup>6-16</sup>,  
28 excised larynges<sup>17-20</sup>, and computational approaches<sup>21-29</sup>, with a review of the literature  
29 found in Mittal et al.<sup>30</sup>. Surprisingly, there is little work that has connected the observed  
30 fluid flow phenomena with the resultant pressure loading at sufficient spatial and temporal  
31 resolutions to provide direct insight into the energy exchange process. Initial work utilized  
32 static VF models in steady flow<sup>31-35</sup>, identifying that the glottal pressure reached a mini-  
33 mum for divergent orientations. Subsequent work investigated the influence of features such  
34 as inferior/superior VF angles<sup>35-37</sup> and inlet and exit VF radii<sup>38-40</sup> on the pressure field.  
35 While providing significant spatial resolution of the VF surface pressure, the use of static  
36 geometries in steady flow, commonly justified by invoking the quasi-steady assumption<sup>41</sup>,  
37 neglects temporal dependencies in the flow. Subsequent work has shown the quasi-steady  
38 assumption overlooks key fluid dynamics, particularly during the opening and closing phases  
39 when flow accelerations are very high<sup>15,42-44</sup>.

40 During the closing phase of a modal phonatory cycle, the glottis forms a divergent chan-  
41 nel. The resultant adverse pressure gradient gives rise to complex flow behavior, including  
42 variations in the flow separation point<sup>45</sup>, formation and propagation of vortices within the  
43 glottis<sup>20,46–48</sup>, and flow asymmetries. This phenomenon has been observed using particle  
44 image velocimetry (PIV) in studies with static<sup>11</sup>, dynamically driven<sup>14</sup>, and self-sustained  
45 oscillating<sup>49</sup> models of the VFs as well as in an excised canine larynx<sup>50</sup>. The resultant  
46 pressure loading has been investigated by exploring a theoretical solution for the asymmet-  
47 ric pressure loading<sup>51–53</sup>. While this empirical approach was derived from unsteady, driven  
48 vocal-fold oscillations, the model implementation relied upon a quasi-steady assumption,  
49 and further neglected three-dimensional effects and supraglottal geometry (i.e., the ven-  
50 tricular folds), which have subsequently been shown to be important in determining the  
51 development of flow asymmetries<sup>54,55</sup>.

52 Finally, despite the fairly common use of two-dimensional VF model geometries that are  
53 extruded in the anterior-posterior direction, the three-dimensionality of the VFs has been  
54 shown to have a significant influence on VF surface pressure loadings<sup>56</sup>, exhibiting a lower  
55 pressure drop than that observed for two-dimensional models, and giving rise to anterior-  
56 posterior variations in the pressure loading. Unfortunately, these effects have largely been  
57 investigated in static models with steady flow. A notable exception measured the unsteady,  
58 three-dimensional intraglottal pressure loading in self-oscillating excised VFs, investigating  
59 the dependence of both anterior-posterior pressure gradients, and unsteady effects<sup>57</sup>. It was  
60 found that the intraglottal pressure reached negative gauge values only along the midline of  
61 the VFs, and not at the anterior and posterior edges. However, the diameter of the pressure

62 sensors used to acquire the intraglottal pressure was relatively large (2.36 mm) compared  
63 to the inferior-superior and anterior-posterior VF dimensions ( $\mathcal{O}(10\text{ mm})$ ), leading to poor  
64 spatial resolution of the flow and obfuscating some of the key dynamical behaviors.

65 Nevertheless, similar results have been observed using computational models of the VFs  
66 undergoing self-sustained oscillations<sup>58,59</sup>. Early efforts<sup>3</sup> validated the computational model  
67 kinematics with synthetic silicone VF models to investigate the aerodynamic energy exchange  
68 during oscillation. The results provided insight into the net energy transfer from the airflow  
69 to the VF tissue, which was found to be positive, validating a previously proposed theory  
70 that the energy transfer from the fluid to the VF must be greater during opening than closing  
71 to produce self-sustained oscillations<sup>5</sup>. However, modeling VF contact is highly challenging  
72 in numerical investigations, which can influence the accuracy of the oscillation dynamics.

73 Despite the extensive efforts devoted to resolving the intraglottal aerodynamic pressure  
74 during VF oscillation, temporal and spatial variations in the pressure have still not been  
75 accurately quantified. This deficiency arises from the challenging environment of voiced  
76 speech production, where tight geometric constraints, in tandem with the high-frequency  
77 of the VF oscillations, pose significant challenges such as accurate positioning of a probe  
78 between the VFs and the disruptive effect of the probe on the flow field<sup>60</sup>. Recently, a new  
79 approach that employs synthetic, self-oscillating VF models in a hemilaryngeal configuration  
80 was developed and validated for accurately measuring the intraglottal aerodynamic pressures  
81 during oscillation<sup>60</sup>. The self-oscillating VF model captures both three-dimensional and  
82 unsteady flow effects addressing the shortcomings of many prior works.

83 The objective of this work is to investigate the effects of flow unsteadiness and three-  
84 dimensionality on the intraglottal pressure distributions in a hemilaryngeal self-oscillating  
85 silicone VF model. The model is incorporated into a novel flow facility that enables, for  
86 the first time, both temporal and spatial resolution of the intraglottal pressure waveform  
87 during the opening and closing phases of the phonatory cycle. The pressure field is then used  
88 to investigate the energy exchange from the airflow to the VFs. The flow facility and the  
89 measurement procedure are described in Section II. The results and discussion are presented  
90 in Section III. Finally, Section IV is left for the conclusions.

## 91 II. METHODS

### 92 A. Hemilaryngeal Flow Facility

93 A synthetic, self-oscillating silicone model of the VFs was used in a hemilaryngeal flow  
94 facility to acquire the intraglottal pressure distribution in both the inferior-superior and the  
95 anterior-posterior directions. The geometry of the VF model and the experimental setup  
96 was similar to that used in prior work (See Section 3.1 in Motie-Shirazi et al.<sup>60</sup>), and is  
97 shown in Figure 1a.

98 Briefly, a constant pressure source provided flow through a Dwyer RMC 101-SSV inline  
99 flow meter (Dwyer, IN, USA) that measured the time-averaged flow rate. Upon exiting the  
100 flow meter, the flow entered a 0.03 m<sup>3</sup> plenum chamber with a cross sectional area of 0.06 m<sup>2</sup>,  
101 whose inner walls were insulated acoustically by foam. The plenum chamber was connected  
102 to a model trachea that was comprised of a 213.0 mm<sup>2</sup> area rectangular channel that was

103 150.0 mm long. The subglottal pressure was monitored with a Kulite ET-3DC pressure  
104 transducer (Kulite, NJ, USA). Together, the plenum chamber and square duct mimic the  
105 acoustic loading of the subglottal tract.

106 The VF model was mounted in a hemilaryngeal configuration by placing it in a bracket  
107 at the exit of the model trachea. The wall against which the VF oscillated extended the  
108 length of the tracheal tract, and could be moved in the inferior-superior direction. This is  
109 referred to as the contact plate (see Figure 1a). A Millar Mikro-Cath pressure sensor (Millar,  
110 TX, USA) was embedded in a groove in the contact plate. The groove was then filled with  
111 Smooth-On Dragon Skin 10 silicone (Smooth-On Inc, PA, USA) to provide a smooth level  
112 surface against which the VF model vibrated.

113 High-speed video (HSV) of the VF kinematics was acquired with a Photron AX200 charge-  
114 coupled device (CCD) camera (Photron, Tokyo, Japan) at 20,000 frames-per-second and a  
115 resolution of 640 pixels by 480 pixels. The camera was positioned superiorly to the VF  
116 exit. An Elicar V-HQ Macro 90 mm f2.5 lens (Jaca Corporation, Tokyo, Japan) provided a  
117 field of view measuring 48.0 mm by 36.0 mm. The HSV, subglottal pressure, and intraglot-  
118 tal pressure signals were all synchronized and acquired using a custom LabVIEW Virtual  
119 Instrument program (National Instruments Corporation, Austin, TX, USA). The subglot-  
120 tal and intraglottal pressure signals were recorded on a National Instruments PCIe-6321  
121 data acquisition card (National Instruments Corporation, Austin, TX, USA) at 80 kHz for  
122 a duration of 0.75 s.

123 A vocal tract was added to the flow facility at the VF exit to include acoustic loading  
124 effects, as shown in Figure 1a. The geometry of the vocal tract was idealized based on the

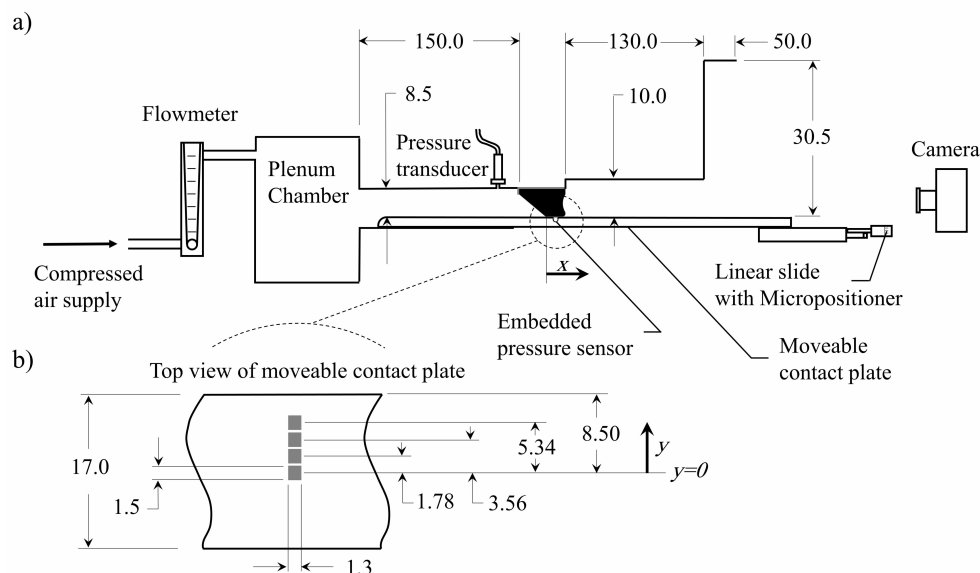

FIG. 1. (a) Schematic of the experimental flow facility. (b) A close-up top view of the contact plate and the relative position of the pressure sensors. All dimensions are in mm.

125 vocal tract geometry of the vowel /o/ reported from magnetic resonance imaging of the  
 126 vocal tract<sup>61</sup>. The supraglottal channel had a constant width of 26.2 mm in the anterior-  
 127 posterior direction, and a total length of 180.0 mm. The medial-lateral height consisted  
 128 of two discrete, connected sections. The first section (exiting the glottis) had a length of  
 129 130.0 mm and a height of 10.0 mm (262.0 mm<sup>2</sup> cross-sectional area), which then transitioned  
 130 to the second section, which measured 50.0 mm long with a height of 30.5 mm (917.0 mm<sup>2</sup>  
 131 cross-sectional area).

132 Four identical contact plates were employed for the measurements, with each containing  
 133 an embedded pressure sensor at a different location in the anterior-posterior direction; one  
 134 at the anterior-posterior midline, with the subsequent ones equally spaced every 1.78 mm  
 135 moving in the anterior direction (see Figure 1b). The coordinate system is defined such  
 136 that  $x = 0$  corresponds to the location of the inferior edge of the glottis when the VF is  
 137 at rest and  $x$  values indicate the distance in the inferior-superior direction. In addition,



138  $y = 0$  corresponds to the anterior-posterior midline and the  $y$  values indicate the distance  
139 in the anterior-posterior direction. A Thorlabs PT1 linear slide (Thorlabs, Newton, NJ,  
140 USA) moved the contact plate in the inferior-superior ( $x$ ) direction to allow the pressure  
141 to be acquired at any location along this direction. The area over which the pressure was  
142 measured was 1.50 mm by 1.30 mm in the inferior-superior and medial-lateral directions,  
143 respectively. The linear slide had a positional accuracy of 0.0254 mm.

## 144 B. Vocal Fold Model

145 The dimensions of the VF model, layer composition, and silicone mixture ratios used  
146 for each layer was the same as prior work<sup>60</sup>, with the dimensions and layer thicknesses  
147 shown in Figure 2. This profile was extruded in the anterior-posterior direction to a length  
148 of 17.0 mm. The modulus of elasticity of each silicone layer, however, was newly quantified  
149 using a TA Instruments AR 2000 Rheometer (TA Instruments, DE, USA ), as opposed to the  
150 previously employed TA Instruments Q 800 dynamic mechanical analysis measurements (TA  
151 Instruments, DE, USA ), to improve accuracy at the low moduli of interest. To perform the  
152 rheology measurements, cylindrical samples with a diameter of 60.0 mm and a thickness of  
153 1.0 mm were created from the same batch of each silicone mixture as the VF layers. Elastic  
154 ( $G'$ ) and viscous ( $G''$ ) shear moduli were measured by performing a frequency sweep from  
155 1 Hz to 100 Hz, which was the upper limit of the instrument, at 1% strain. The results are  
156 presented in Figure 3 and are compared with values from human VF cover measurements<sup>62</sup>.  
157 Good agreement with the physiological data is found for the silicone values.

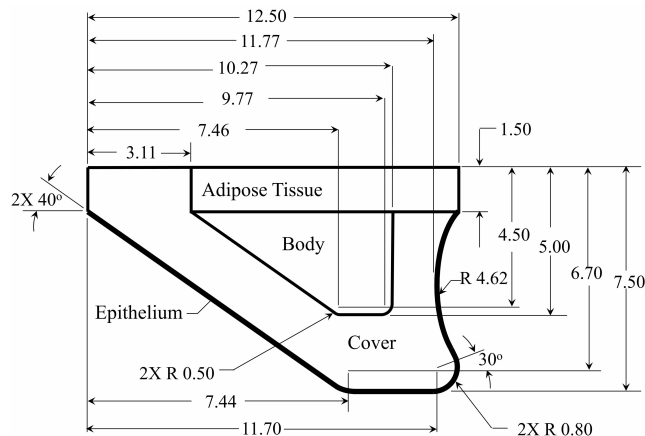

FIG. 2. Geometry and dimensions of the synthetic VF model. All dimensions are in mm.

158 The complex modulus of elasticity ( $E^*$ ) of an isotropic material is related to the complex  
 159 shear modulus ( $G^* = G' + iG''$ ) and Poisson's ratio ( $\nu$ ) by

$$E^* = 2G^*(1 + \nu). \quad (1)$$

160 Poisson's ratio has been measured to be  $\approx 0.4$  for different mixture ratios of silicone at  
 161 1% strain<sup>63</sup>. Using these relationships, the magnitude of complex modulus of elasticity at  
 162 a frequency of 100 Hz was computed for each layer, and is reported in Table I alongside  
 163 the range of physiological values. Good agreement is found between the physiological and  
 164 synthetic values.

### 165 C. Pressure Measurement Procedure

166 During VF oscillation each of the movable contact plates was independently inserted  
 167 and positioned such that the pressure sensor was located superior to the VF. The contact  
 168 plate was then moved in the inferior direction in increments of 0.254 mm. The unsteady  
 169 intraglottal pressure at each location was acquired by the pressure sensor. Figure 4 shows

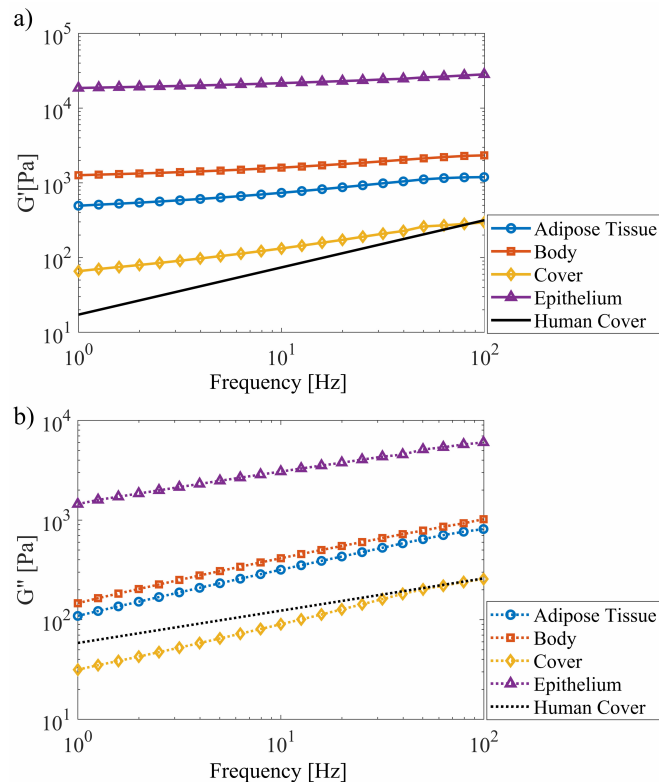

FIG. 3. (Color online) (a) Elastic ( $G'$ ) and (b) viscous ( $G''$ ) shear moduli of different layers of the VF model with corresponding values for human VFs<sup>62</sup>. Axes are plotted on a logarithmic scale.

170 the initial and final positions (I and II) of the sensor relative to the VF model at rest.  
 171 Note that the airflow caused the VF to bulge slightly in the superior direction such that  
 172 contact did not occur at the exact glottal midpoint of the rest position of the VF model.  
 173 After sampling for 0.75 s at each location, which produced about 120 cycles for an oscillation  
 174 frequency of 160 Hz, the waveforms were then phase-averaged based on the oscillation cycle,  
 175 resulting in a time-varying mean pressure waveform.

TABLE I. Moduli of elasticity of physiological and silicone vocal fold models for each layer.

| Layer          | Physiological range<br>(kPa) | Silicone VF Model<br>(kPa) |
|----------------|------------------------------|----------------------------|
| Adipose tissue | 1 – 10 <sup>79</sup>         | 4.04                       |
| Body           | 1.5 – 50 <sup>80–82</sup>    | 7.13                       |
| Cover          | 1 – 8 <sup>62,81,83–86</sup> | 1.10                       |
| Epithelium     | Not measured                 | 81.10                      |

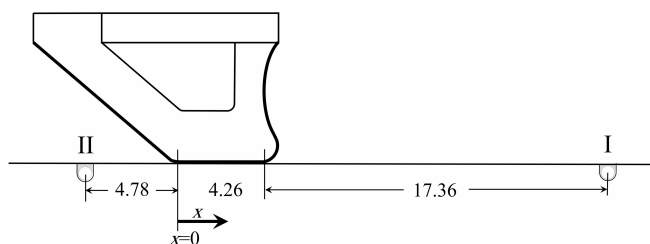

FIG. 4. Schematic of the initial (I) and final (II) positions of the pressure sensor moving with the contact plate relative to a stationary VF model. All dimensions are in mm.

### 176 III. RESULTS AND DISCUSSION

#### 177 A. Oscillation Dynamics

178 VF oscillation dynamics were investigated with a medial prephonatory compression of  
 179 0.75 mm that resulted in a medial prephonatory pressure of 1.25 kPa. These are, respectively,  
 180 the medial distance that the VF is deformed into the hemilaryngeal plate when it is in a

181 static configuration, and the resulting static pressure (see Motie-Shirazi et al.<sup>60</sup> for further  
182 details). Due to the medial compression, the length of the glottis in the inferior-superior  
183 direction during self-oscillation was  $\sim 1.5$  times greater than for the static geometry with  
184 no medial compression. The onset pressure of the VF model was measured to be 1.70 kPa.  
185 The intraglottal pressure measurements were performed at a mean subglottal pressure of  
186  $p_{\text{sub}} = 2.20$  kPa. The mean flow rate was measured to be 338 mL/s. The fundamental  
187 frequency of oscillation was 160 Hz yielding a period ( $T$ ) of 6.25 ms.

188 Figure 5 shows a kymogram plot of an oscillation cycle at the mid anterior-posterior  
189 location extracted from the HSV. At this location, the open quotient ( $OQ = T_{\text{open}}/T$ ) was  
190 calculated to be  $\simeq 0.78$  and the speed quotient ( $SQ = T^+/T^-$ ) was  $\simeq 2.09$  where  $T_{\text{open}}$ ,  
191  $T$ ,  $T^+$ , and  $T^-$  are defined in Figure 5. Both  $OQ$  and  $SQ$  are in the physiological ranges  
192 for human VFs<sup>64,65</sup>. The visible medial boundary of the VF was determined by defining a  
193 threshold value, and a least-squares regression<sup>66</sup> was then used to fit two sinusoidal functions  
194 to the boundary during the VF opening and closing phases, indicated by the solid and dashed  
195 lines, respectively. These functions were then used to estimate the VF surface velocity to  
196 calculate the aerodynamic energy, as explained in Section III B 3. The onset pressure and  
197 flow rate of the synthetic model were higher than physiological values<sup>67</sup>. This behavior has  
198 been observed in prior investigations with hemilaryngeal configurations<sup>57,68,69</sup>. In addition,  
199 a relatively high medial prephonatory compression was required to get robust contact in the  
200 synthetic models, which also increased the onset pressure and the flow rate. In spite of the  
201 higher subglottal pressures, the VF kinematics are representative of physiological motion.

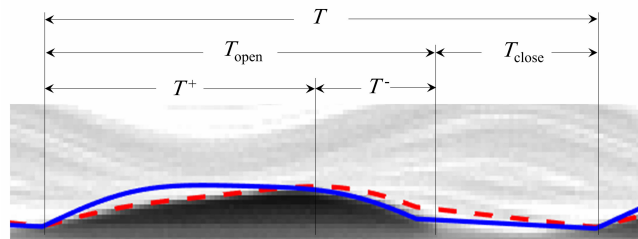

FIG. 5. (Color online) Kymogram at the mid anterior-posterior location of the VF model. Solid and dashed lines identify the sinusoidal functions that were respectively fitted to the inferior edge of the VF during closure, and the superior edge during opening, via least-squares regression<sup>66</sup>.

202 The glottal height ( $d_g$ ) at the four positions in the anterior-posterior direction are plotted  
203 in Figure 6 as a function of time ( $t$ ), normalized by  $T$ . The distance from the midline,  $y$   
204 (See Figure 1b), is normalized by the glottal half width in the anterior-posterior direction,  
205 which was  $w_g/2 = 0.85$  mm. The physical locations relative to the model geometry are  
206 indicated in the inset image. Note, the stepwise behavior of the glottal distance is due to  
207 the limit of the spatial resolution of the images, which was 0.077 mm/pix. The maximum  
208 glottal distance occurred at the midpoint and was calculated to be  $d_{g,\text{max}} = 0.67$  mm, which is  
209 physiologically accurate<sup>70</sup>. It can be seen that VF closure occurred at the sides first, and then  
210 progressed toward the midline, with a similar pattern observed during opening. Moreover,  
211 the open quotient was greatest at the midpoint, and decreased towards the anterior-posterior  
212 endpoints. The maximum glottal area was 8.45 mm<sup>2</sup>, which is also representative of clinical  
213 measures<sup>71</sup>.

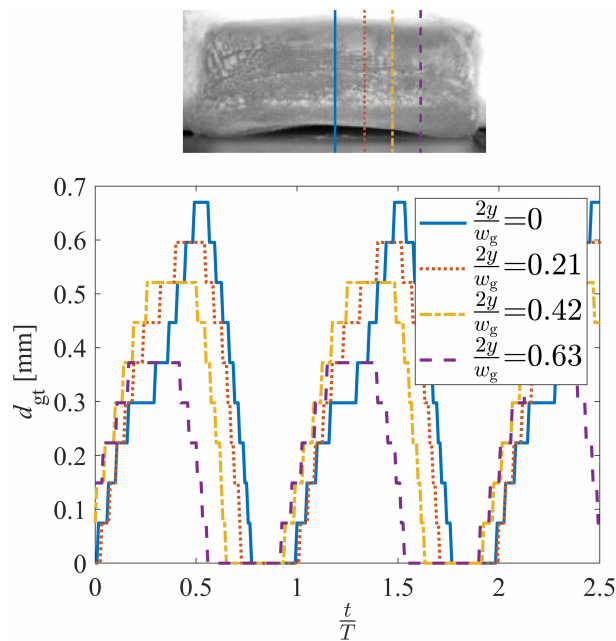

FIG. 6. (Color online) Glottal distance at different anterior-posterior locations as a function of normalized time.

## 214 B. Aerodynamic Pressure

### 215 1. Convergent Phase

216 The spatial variation of the intraglottal aerodynamic pressure in the inferior-superior di-  
 217 rection was computed as the normalized pressure drop, relative to the subglottal pressure,  
 218  $p_{\text{sub}}$ , expressed as  $(p - p_{\text{sub}})/p_{\text{sub}}$ . Figure 7(a-d) presents surface pressure measurements  
 219 at the four anterior-posterior locations and at four different instances in time during VF  
 220 opening, corresponding to  $t/T = 0, 0.26, 0.39,$  and  $0.45$ , respectively. The abscissa indi-  
 221 cates the distance from the inferior glottal margin when the VF is at rest and the medial  
 222 prephonatory compression is not applied, normalized by the inferior-superior glottal length  
 223 of  $l_g = 4.26$  mm (See Figure 4). The inset images are a superior view of the VF orientation

224 at the corresponding times, and denote the anterior-posterior position of the four pressure  
225 measurements, indicated by the corresponding line types. At the VF midline, the opening  
226 started at  $t/T = 0$  and ended at  $t/T = 0.52$ . The dashed vertical lines  $x/l_g = 0$  and  $x/l_g = 1$   
227 indicate the location of the inferior and superior boundaries of the glottis when the VF is  
228 at rest.

229 A video showing the progression of the intraglottal pressure distributions throughout the  
230 entire oscillatory cycle is included as a supplementary file<sup>72</sup>. The still images of Figure 7  
231 are extracted from this video, as well as those discussed in Section III B 2 for the divergent  
232 orientations.

233 During VF opening (see Figure 7) the mean subglottal pressure decreased as the flow  
234 accelerated as it entered the glottis. A sharp decrease in the pressure occurred as the flow  
235 passed through the glottis. Note that for Figure 7(b-d) the pressure within the glottal region  
236 plateaus, before sharply decreasing. This can be explained by the viscous losses within the  
237 glottis being balanced by the total acceleration of the flow. The minimum pressure then  
238 occurred at the glottal exit, where the glottal gap height was smallest. The location of the  
239 glottal entrance and exit along the midline of the VF are noted in Figure 7 by the succes-  
240 sive solid arrows. Comparing these locations across Figure 7(b-d) shows that the glottal  
241 entrance and exit were largely stationary during the opening phase of the VF oscillation.  
242 Nevertheless, the consistent shift in the location of the superior edge of the VF (the mini-  
243 mum pressure location) relative to the static position of the superior VF edge indicates the  
244 presence of superior VF bulging during oscillation. The intraglottal pressure measurements  
245 were compared with prior results acquired along the midline of three-dimensional static VF



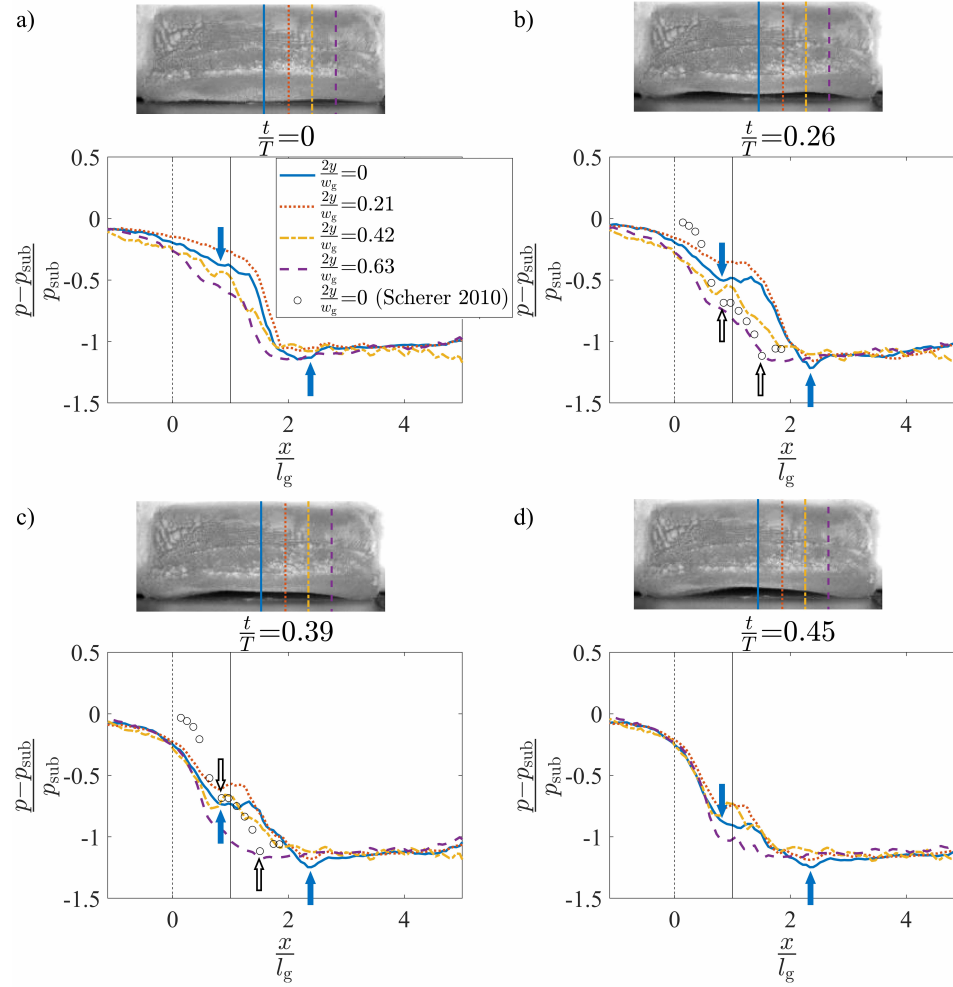

FIG. 7. (Color online) The normalized intraglottal pressure drop versus the normalized inferior-superior distance, plotted at four positions in the anterior-posterior direction, and at normalized times of (a)  $t/T = 0$ , (b)  $t/T = 0.26$ , (c)  $t/T = 0.39$ , and (d)  $t/T = 0.45$ . The times coincide with a convergent glottal configuration. The solid arrows indicate the glottal entrance and exit at  $2y/w_g = 0.0$ . Each inset presents a superior view of the VF orientation at the same instance in time. Dashed and solid vertical lines at  $x=0$  and  $x=1$ , respectively, identify the glottal entrance and exit when the VF is in its rest configuration. Pressure measurements from steady flow, static investigations<sup>56</sup> are included in subplots (b) and (c) with the glottal margins indicated by hollow arrows.

246 models in steady flow<sup>56</sup>, represented as circles in Figure 7(b,c). The static models had a 10°  
247 convergence angle and a fixed medial-lateral glottal distance of 0.8 mm. For comparison, the  
248 estimated location of the glottal entrance in the current self-oscillating model was aligned  
249 with the glottal entrance in the prior static model investigations. The inferior-superior  
250 distance of both the prior static model investigations and the current self-oscillating ones  
251 were normalized by each corresponding inferior-superior glottal length, which were 3.00 and  
252 4.26 mm, respectively. The glottal entrance and exit of the static model are indicated with  
253 hollow arrows in Figure 7(b-c). The location of the glottal exit did not match because  
254 the glottal length of the synthetic model increased during oscillation, as described above,  
255 but was fixed for the static model. The intraglottal pressure profiles in these models are  
256 very similar, with a change in the slope at the entrance and a drop in the pressure at the  
257 glottal exit. Similar behavior has been reported in static models with convergent glottal  
258 profiles<sup>31,35,36,40,73</sup>.

259 The effect of unsteady flow was investigated by comparing the temporal progression of  
260 the intraglottal pressure waveform during VF opening, presented sequentially in Figure 7(a-  
261 d). The mean intraglottal pressure decreased at all anterior-posterior locations as the VF  
262 was opening. This contradicts the oft-employed quasi-steady assumption that is invoked  
263 when investigating pressure-flow relationships through static VF models. As the glottal  
264 area increases during opening, the quasi-steady assumption predicts the glottal pressure  
265 should increase. Instead, the increased subglottal pressure that builds up during VF closure  
266 results in a temporally-accelerating flow field that produces a significant decrease in the  
267 nondimensionalized intraglottal pressure drop. While prior work has identified the existence

268 of high flow acceleration during opening<sup>17</sup>, these findings indicate how the accelerating flow  
269 influences the intraglottal pressure field. In particular, these results show that the decrease  
270 in pressure due to flow acceleration is much greater than the pressure increase associated  
271 with the increasing glottal area.

272 The average intraglottal pressure varied in the anterior-posterior direction as a function  
273 of time. During the later stages of opening (Figure 7(c-d)), the pressure magnitude in  
274 the entrance of the glottis remained largely constant, while the more anterior positions of  
275  $2y/w_g = 0.21$  and  $0.42$  increased slightly, before subsequently decreasing. At  $2y/w_g = 0.63$   
276 the pressure is significantly lower for all inferior-superior positions. These variations are  
277 likely due to the three-dimensional geometry, which leads to varying pressure losses within  
278 the glottis. This, in turn, drives three-dimensional flow behavior, as has been previously  
279 observed<sup>56</sup>. Moreover, as can be seen in Figure 7, the pressure field at the anterior-posterior  
280 location of  $2y/w_g = 0.42$  exhibited significantly different behavior than that observed at  
281 the midline. During the early phases of opening, the pressure was lower than that at the  
282 midline, but then increased to higher values as the cycle progressed. This is likely due to the  
283 anterior-posterior asymmetry in VF closure, where the midline closes slightly sooner than  
284 more anterior locations.

## 285 **2. Divergent Phase**

286 The spatial variation of the normalized intraglottal pressure drop during VF closure  
287 is plotted in Figure 8(a-d) at four normalized times of  $t/T = 0.52, 0.68, 0.74,$  and  $0.77,$   
288 respectively. The pressure profiles are not presented at  $2y/w_g = 0$  and  $0.21$  because closure

289 at these locations has already occurred at the selected times. Similarly,  $2y/w_g = 0.21$  is not  
290 plotted in Figure 8(d) for the same reason. The inset images show a superior view of the VF  
291 motion at the same instant in time, with the vertical lines indicating the anterior locations  
292 at which the aerodynamic pressure was recorded. A clear divergent profile was present  
293 during the closing phases of oscillation, as was observed in the kymogram of Figure 5)  
294 and a kymogram extracted from the position  $2y/w_g = 0.21$  (not shown for brevity). For  
295 kymograms extracted at the more anterior/posterior positions of  $2y/w_g = 0.42$  and  $0.63$ ,  
296 propagation of the mucosal and the resultant divergent profile were not as pronounced.

297 The glottal entrance and exit at the midline of the VF are indicated by the solid arrows  
298 in Figure 8(b-d). The entrance locations were identified based on the assumption that the  
299 pressure will be a minimum at the glottal entrance (the minimum glottal area) when the  
300 glottis assumes a divergent orientation. At the beginning of VF closure when  $t/T = 0.52$   
301 (Figure 8(a)), the glottis was largely a uniform channel, and so it was difficult to identify  
302 the precise location of the glottal entrance. In this state, the glottal entrance was presumed  
303 to be at the same position as found at the other times during closure because, as can be  
304 seen in Figure 8(b-d), this location did not change significantly over time. Downstream of  
305 the minimal glottal area, pressure recovery occurred in the divergent glottal channel. The  
306 precise location of the glottal exit was difficult to identify because at the exit of the glottis,  
307 the pressure was essentially the same as the pressure in the supraglottal tract. Therefore, the  
308 location of the glottal exit at each of the anterior locations was estimated by assuming that  
309 the glottal length remained equal to the value found for the convergent glottal orientation,  
310 as described in Section III B 1.

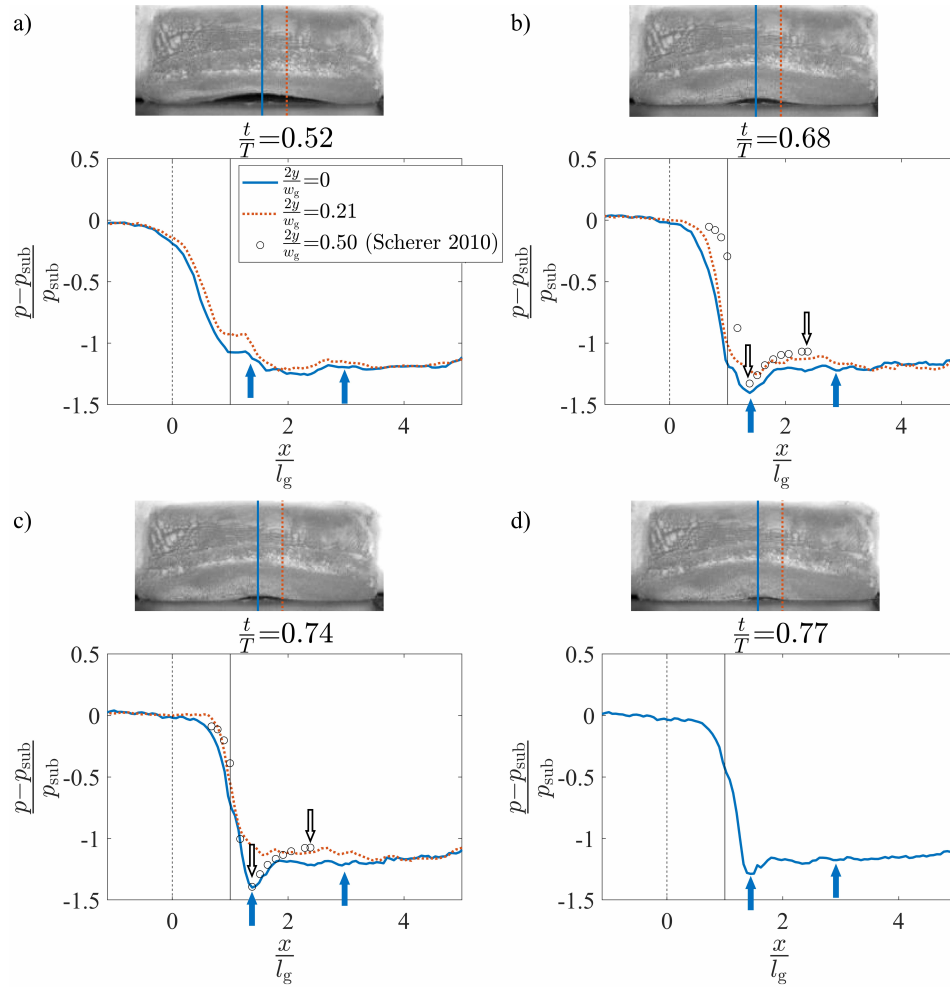

FIG. 8. (Color online) The normalized intraglottal pressure drop versus the normalized inferior-superior distance, plotted at four positions in the anterior-posterior direction, and at normalized times of (a)  $t/T = 0$ , (b)  $t/T = 0.26$ , (c)  $t/T = 0.39$ , and (d)  $t/T = 0.45$ . The times coincide with a divergent glottal configuration. The solid arrows indicate the glottal entrance and exit at  $2y/w_g = 0.0$ . Each inset image presents a superior view of the VF orientation at the same instance in time. Dashed and solid vertical lines at  $x=0$  and  $x=1$ , respectively, identify the glottal entrance and exit when the VF is in its rest configuration. Pressure measurements from steady flow, static investigations<sup>56</sup> are included in subplots (b) and (c) with the glottal margins indicated by hollow arrows.

311 From the pressure distributions it can be seen that the glottal entrance at the anterior-  
312 posterior midline of the VF was shifted to  $x/l_g \simeq 1.4$ . This indicates increased superior  
313 bulging relative to the convergent phase, where the glottal entrance was at  $x/l_g \simeq 0.8$ . The  
314 minimum pressure in the divergent phase was lower than in the convergent phase due to the  
315 pressure recovery arising from the divergent orientation.

316 The intraglottal pressures are compared in Figure 8 with prior results of steady flow  
317 through three-dimensional static VF models with a  $10^\circ$  divergent glottal profile and a fixed  
318 medial-lateral glottal distance of 0.8 mm.<sup>56</sup> The intraglottal pressure distributions obtained  
319 from the static model investigations at anterior positions of  $2y/w_g = 0.50$  and  $0.0$ <sup>56</sup> are  
320 plotted as hollow circles in Figure 8(b, c), respectively. For comparison, the divergent  
321 angle of the self-oscillating VF model was estimated from the recorded HSV during the  
322 closing phase of the VF based on the known medial-lateral displacement of the inferior and  
323 superior edges (see the VF edges at  $T^-$  in Figure 5), and the inferior-superior length of the  
324 medial surface when at rest. It was found that at an anterior position of  $2y/w_g = 0.21$ , a  
325 divergent angle of  $\sim 10^\circ$  occurred at  $t/T = 0.68$  (Figure 8(b)) and for an anterior position of  
326  $2y/w_g = 0$  the divergence angle was  $\sim 10^\circ$  at  $t/T = 0.74$  (Figure 8(c)). Similar to Figure 7,  
327 the estimated location of the glottal entrance was aligned with the glottal entrance from the  
328 static model investigations, and the inferior-superior length of each scenario was normalized  
329 by the inferior-superior medial surface length. Reasonable agreement is observed between the  
330 static and dynamic pressure profiles, which is not surprising as unsteady effects due to flow  
331 acceleration are not anticipated to be as significant during the latter phases of the phonatory  
332 cycle. The magnitude of the minimum pressure was lower at the middle when compared

333 to the anterior/posterior positions, again indicating the presence of three-dimensional flow  
334 behavior.

335 The temporal variation of the intraglottal pressure during VF closure was observed by  
336 comparing the temporal evolution of the minimum pressure peak, which occurs at the min-  
337 imal glottal area. As the VFs closed, this value decreased as the minimum glottal area  
338 became smaller, and the subsequent pressure loss across the glottis increased. However, it is  
339 interesting to note that immediately preceding closure, at  $t/T = 0.77$ , the minimum pressure  
340 increased, despite the continued decrease in the glottal area (see the insets of Figure 8(c,d)).  
341 This increase in the minimal pressure can be explained by an increase in the viscous pressure  
342 loss when the glottal orifice becomes very small at the end of closure, resulting in a decrease  
343 in the flow velocity and consequently a rise in the pressure. This is an important observation  
344 that is not captured by static VF investigations.

### 345 *3. Aerodynamic Energy*

346 The transfer of energy from the airflow to the VF within the glottis was investigated. The  
347 power transferred to the VF is approximately equal to the product of the normal force applied  
348 on the VF glottal surface and the normal component of the surface velocity<sup>3</sup>. The VF velocity  
349 magnitude in the inferior-superior direction is negligible compared to the medial-lateral  
350 velocity and the viscous forces applied on the VF have a minor influence on the transferred  
351 power<sup>3</sup>. Therefore, the medial-lateral component of the velocity and the fluid pressure were  
352 used to estimate the power transfer. At each of the four anterior-posterior locations, the  
353 medial-lateral component of glottal surface velocity was estimated from kymogram plots at

354 the same position where the pressure measurements were acquired. Two sinusoidal functions  
355 were fit to the visible medial boundary of the VF, which is the superior edge during opening  
356 and the inferior edge during closing, using least-squares regression<sup>66</sup>, as shown in Figure 5.  
357 The magnitude of the glottal surface velocity in the medial direction ( $v_g$ ) was then estimated  
358 by computing the derivative of these functions at each instance in time. This assumes the  
359 medial VF surface velocity is equal to the superior edge velocity during opening, and the  
360 inferior edge velocity during closing. While admittedly an approximation, it provides a  
361 first-order estimate of the VF surface velocity. Because the VF surface velocity could not  
362 be estimated outside the glottal region, the power transfer was only investigated within the  
363 glottis.

364 The medial VF displacement and surface velocity are presented in Figure 9(a) as a func-  
365 tion of the normalized time over an oscillation cycle. The lines with circle symbols represent  
366 the medial-lateral glottal distance during opening and closure, with the ordinate axis on the  
367 left showing the magnitude. The lines without symbols are the corresponding medial surface  
368 velocity, as represented by the ordinate axis on the right. The dash-dot line identifies the  
369 contact phase when the VF was closed and the displacement and the velocity were zero.  
370 The velocity of the medial surface was positive during opening and negative during closure.

371 At each of the anterior-posterior locations, the time-varying aerodynamic power per unit  
372 anterior-posterior width ( $\dot{W}'$ ), denoted by the prime superscript, during opening and closing  
373 of the VF was calculated by multiplying the VF surface velocity with the integral of the



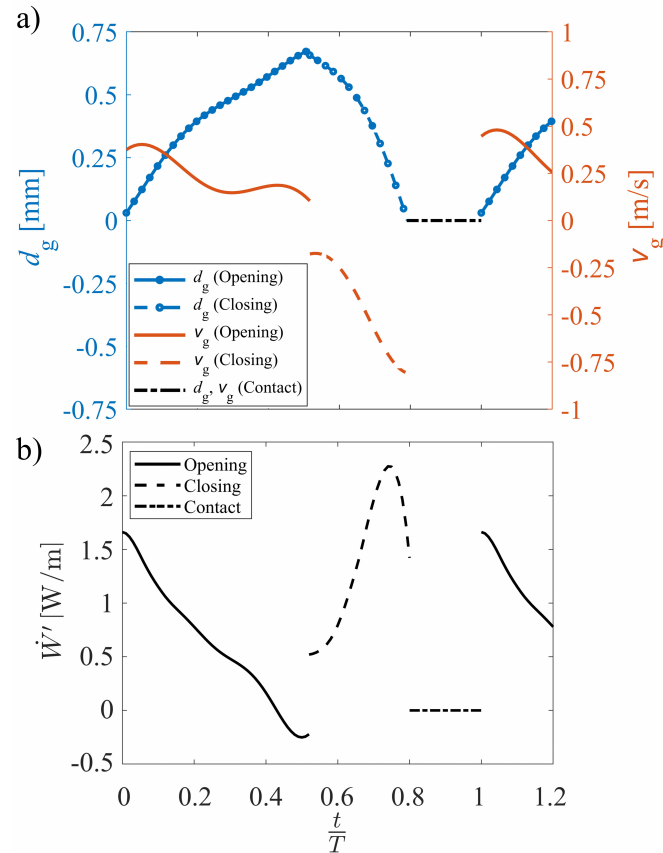

FIG. 9. (Color online) Temporal change in (a) the glottal distance and velocity calculated from the fitted curves to the extracted kymogram, and (b) the power per unit anterior-posterior width, at  $2y/w_g = 0.0$  during the VF opening phase, closing phase, and contact.

374 pressure between the inferior and superior margins of the glottis according to

$$\dot{W}'_k(t) = v_g(t) \int_{x_{\text{inf}_k}}^{x_{\text{sup}_k}} p_k(x, t) dx, \quad (2)$$

375 where  $p(x, t)$  indicates the intraglottal pressure at the inferior-superior location of  $x$  at time  
 376  $t$ . The limits  $x_{\text{inf}}$  and  $x_{\text{sup}}$  denote the location of the inferior and superior edges of the VF,  
 377 which were estimated based on the pressure distributions during the opening and closing  
 378 phases, using the method explained in Sections III B 1 and III B 2. The subscript  $k$  varies

379 from 1 – 4 and corresponds to the four anterior-posterior positions at which the pressure  
380 was acquired.

381 The time dependence of  $\dot{W}'_a$  at the midline of the VF is plotted in Figure 9(b). During  
382 VF opening the intraglottal power was initially positive because the spatial average of the  
383 intraglottal pressure was in phase with the surface velocity and they both have a positive  
384 magnitude, indicating the transfer of energy from the airflow to the VF. The power de-  
385 creased in time due to the decreasing intraglottal pressure, as can be seen in the sequential  
386 progression of Figure 7(a-d). This was due to the unsteady flow acceleration. The power  
387 transfer became negative during the last 10% of the opening phase as the spatial average of  
388 the intraglottal gauge pressure became negative while the surface velocity was still positive,  
389 denoting that energy began to be transferred from the VF back to the fluid even as the VF  
390 was still opening. This is a unique behavior that arises from the unsteady flow acceleration,  
391 and that is not captured by quasi-steady investigations.

392 A discontinuity is observed in Figure 9 when the VF transitioned from the opening to  
393 closing phase. This is due to the discrete change in the surface velocity that occurred due to  
394 the technique that was employed for estimating it. Namely, the assumption that the medial  
395 surface velocity is equal to velocity at the superior VF edge during opening, and the inferior  
396 edge during closing.

397 During the closing phase, both the intraglottal pressure and velocity were negative, which  
398 lead to a positive power transfer, indicating that the direction of the energy transfer was  
399 again from the fluid to the VF. The power initially increased during the closing phases as  
400 the intraglottal pressure became more negative as the glottal orifice became smaller and the

401 flow accelerated (see Figure 8(b ,c)). Immediately preceding closure, however, the power  
402 rapidly decreased due to the rapid increase in the intraglottal pressure, as was observed in  
403 Figure 8(d), likely because of the decrease in the glottal velocity due to the high viscous  
404 losses when the glottal orifice becomes very small , immediately preceding contact.

405 Although the mechanics of energy transfer have been studied numerically<sup>5,53,74</sup>, computationally<sup>3</sup>,  
406 and in driven synthetic VF models<sup>16</sup>, they have never been explored experimentally in  
407 self-oscillating VFs. Nevertheless, the calculated aerodynamic power variation can be com-  
408 pared with values from the prior investigations utilizing two-dimensional computational  
409 models<sup>3</sup>and a driven synthetic VF model<sup>16</sup>. In both of these computational and driven  
410 model studies, the power was computed over the entire medial surface of the VF, as op-  
411 posed to considering only the contribution from the medial component of the VF surface  
412 velocity and only in the glottal region, as performed in the current study. Nevertheless,  
413 similar behavior was observed in the time-varying aerodynamic power during the opening  
414 phase of oscillation, with an initial positive value that subsequently decreased, reaching a  
415 negative value as the glottis reached maximum opening (compare Figure 9(b) to Figure 12  
416 in<sup>3</sup> and Figure 13 in<sup>16</sup>). However, during the closing phase, the power in the computational  
417 and the driven model investigations reached more negative values at the beginning of the  
418 closing phase and then increased, becoming positive only at the end of the closing phase. In  
419 the current study the power was always positive during the closing phase. This discrepancy  
420 is likely due to the power transfer that occurred in the VF entrance regions, which was in-  
421 cluded in the computational and the driven models and not in the current synthetic silicone  
422 model investigation. For example, at the beginning of the closing phase, the magnitude

423 of the pressure within the glottis was negative while the pressure in the subglottal region  
424 was positive, as can be seen in Figure 8(a). This resulted in positive power transfer in the  
425 self-oscillating model, which only considered the negative pressure within the glottis when  
426 computing the power transfer. In contrast, the power transfer in the computational and the  
427 driven models were positive because it considered the pressure distribution across the entire  
428 VF surface, including the regions of positive pressure inferior to the glottis. However, as  
429 the VFs closed, the intraglottal pressure decreased, see Figures 8(c,d). Because the surface  
430 velocity inside the glottis is higher than along the inferior surfaces, the power transfer that  
431 occurs within the glottis drives the energy exchange. This is evidenced by the net power  
432 subsequently increasing in all of the models. One important feature of the power transfer  
433 that was not captured by the computational and the driven models was the sharp drop in  
434 power immediately preceding VF closure, which was due to increased pressure losses arising  
435 from viscous effects as the glottal orifice becomes very small. This is likely because in the  
436 computational investigations, the collision phase was not modeled (i.e., a finite glottal area  
437 was always present) thereby altering the aerodynamic behavior during closure. In the driven  
438 model, a Bernoulli flow assumption was used to obtain the pressure field, which neglected  
439 the viscous effects of the flow and was not able to predict the pressure rise at the end of the  
440 closing phase.

441 The variation of the intraglottal aerodynamic energy transfer as a function of anterior-  
442 posterior position was also investigated. The aerodynamic energy transferred per unit width  
443 ( $W'$ ) during the opening and closing of one VF oscillation was calculated by integrating the

444 power per unit width over time as

$$W'_k = \int_{t_{i_k}}^{t_{e_k}} \dot{W}'_k(t) dt \quad (3)$$

445 where  $t_i$  and  $t_e$  are the times corresponding to start and end of the opening or closing of  
446 the VF at the specified anterior-posterior location, as denoted by the subscript  $k$ . The total  
447 aerodynamic energy per unit width at the four anterior-posterior directions is shown in  
448 Figure 10 along with the respective contributions from the opening and closing phases. The  
449 total aerodynamic energy transfer was positive across the entire anterior-posterior width,  
450 indicating that throughout an oscillation cycle, net energy is transferred from the fluid to  
451 the VF across the anterior-posterior direction. However, the total energy per unit width  
452 decreased significantly from the midline to the anterior edge, indicating that the majority  
453 of the energy exchange occurs at the middle of the VFs. The total energy at the location of  
454  $2y/w_g = 0.63$  was only 14% of the value at the midline. These findings further reinforce the  
455 importance of considering three-dimensional effects.

456 It is interesting to note that while the midpoint experienced largely the same amount of  
457 positive energy transfer during both opening and closing, the more anterior locations exhibit  
458 a marked increase in energy transfer during the opening versus closing phases. The energy  
459 during opening increased from the midline to  $2y/w_g = 0.21$  because of the increased intra-  
460 glottal pressure at this same location, as observed in Figure 7(a-d). It is believed that this  
461 anterior-posterior variation in the intraglottal pressure was due to the three-dimensional flow  
462 behavior that occurred. During closure, the energy transfer decreased and became slightly  
463 negative at  $2y/w_g = 0.42$  because the glottal profile was less divergent at this location. Con-

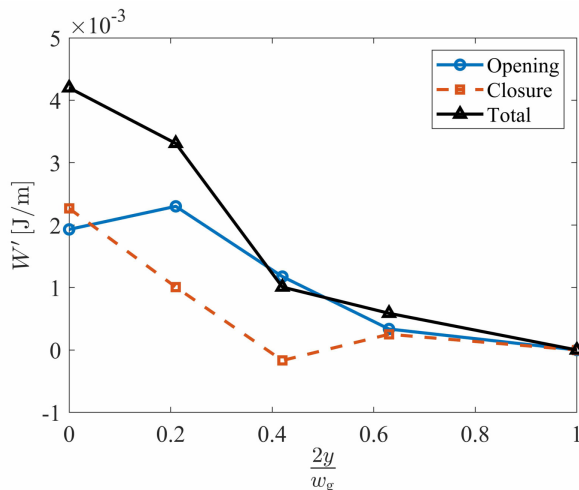

FIG. 10. (Color online) Aerodynamic energy per unit anterior-posterior width computed during VF opening and closing, and the total aerodynamic energy transferred over the entire phonatory cycle, as a function of anterior-posterior location.

464 sequently, the minimum gauge pressure remained positive. The energy transfer, computed  
 465 as the product of the pressure and the negative surface velocity was, therefore, negative.

466 The total energy transferred to the VF within the glottis can be computed by assuming  
 467 a linear variation between the energy at each anterior-posterior location that goes to zero at  
 468 the anterior-posterior edge, and integrating the energy over the anterior-posterior direction.

469 Note that because the pressure field was assumed symmetric about the anterior-posterior  
 470 midline, the energy was only computed over half of the VF width, and then multiplied by

471 2. The aerodynamic energy transfer,  $W$ , during the opening and closing phases, as well as  
 472 the total amount, were found to be

473 
$$W_{\text{Opening}} = 17.52\mu J, W_{\text{Closure}} = 8.29\mu J, W_{\text{Total}} = 25.81\mu J, \text{ respectively.}$$

474 The net energy transfer was positive during both opening and closing, which is in contrast  
 475 with prior numerical<sup>3</sup> and driven VF model<sup>16</sup> observations, although only the intraglottal en-

476 ergy transfer was considered in the current work. Nevertheless, these findings are consistent  
477 with the theory that the net energy transfer must be positive to ensure self-oscillation<sup>5</sup>. The  
478 energy transfer per unit width at the anterior-posterior midline accounted for  $\approx 45\%$  of the  
479 total energy transfer to the VFs, with the middle third of the glottis accounting for over  
480 80% of the total aerodynamic energy transfer. While prior work<sup>56</sup> has highlighted how the  
481 surface pressure is influenced by anterior-posterior variations, the energy transfer is found  
482 to be even more centrally concentrated along the glottal midline due to the multiplicative  
483 relationship between the decreased pressure and surface velocity at the anterior-posterior  
484 endpoints. The concentration of the energy transfer in the middle of the VF also suggests  
485 that more energy is also dissipated along the midline, which coincides with where VF fatigue  
486 and damage are most likely to occur<sup>75,76</sup>. This may help explain the prevalence of some VF  
487 pathologies such as polyps and nodules in the mid anterior-posterior direction of the VFs<sup>77</sup>.

488 The variation in energy transfer due to the inferior-superior VF limits over which the  
489 aerodynamic pressure is considered has implications for reduced-order VF models as well  
490 since, historically, they only consider the contribution to intraglottal energy transfer from  
491 medial-lateral force and velocity components<sup>78</sup>, as in the current work. Discrepancies due to  
492 the approximation of the medial surface velocity in the current investigations are also likely  
493 to influence the energy exchange.

494 It is interesting to note that the aerodynamic power per unit width (see Figure 9(b)), when  
495 multiplied by the total glottal width of 17.0 mm yields a maximum value of  $\sim \mathcal{O}(0.01W)$ ,  
496 which is consistent with prior lumped-element modeling efforts<sup>53,74</sup>. Note that the work  
497 of Zañartu et al.<sup>74</sup> reports a similar value for the power transfer as shown in Figure 5 in

498 the article, although the associated text reports an incorrect value due to a typographical  
499 error. However, the value of the aerodynamic power in the analogous numerical<sup>3</sup> and driven  
500 VF work<sup>16</sup> is reported to be two orders of magnitude larger. This difference arises due  
501 to computing the power over the entire VF surface, as opposed to just within the glottis.  
502 In addition, there also appears to be an inconsistency in how the power was computed in  
503 these studies. Namely, the aerodynamic power can be calculated as the product of the  
504 pressure integrated over the area and the surface normal velocity, as specified by Equation  
505 5. However, as shown in Figure 14 in<sup>3</sup>, the aerodynamic pressure at time  $t = 0.057$  s can  
506 be conservatively estimated to be  $\approx 3,000$  Pa over the entire VF surface, which is given to  
507 be 1.7 cm in the anterior-posterior direction, and from the same figure, can be estimated to  
508 be  $\approx 1.5$  cm in the inferior-superior direction. The product of these values yields a normal  
509 force of  $\approx 0.8$  N. The surface velocity can be estimated from the slope of the change in  
510 orifice width in time, given in Figure 12(a) in<sup>3</sup>. At time  $t = 0.057$  s, the slope of the orifice  
511 width curve is  $\approx 0.7$  m/s. The resultant power should then be  $\sim \mathcal{O}(0.1W)$ . Although this  
512 value is larger than those reported in the current physical models, this is likely due to the  
513 simple estimation of a constant pressure being distributed over the entire VF surface area for  
514 ease of calculation in the current discussion. This clearly overestimates the power transfer.  
515 Nevertheless, despite this assumption, the estimated value is still over an order of magnitude  
516 smaller than the aerodynamic power, reported as  $\approx 8.5$  J/s at  $t = 0.057$  s in Figure 12(b) of  
517 Thomson et al<sup>3</sup>. In the same way, it can be inferred that the power magnitude computed in  
518 the driven model<sup>16</sup> is at least an order of magnitude higher than expected.



519 **IV. CONCLUSIONS**

520 Investigation of the intraglottal aerodynamic pressure was performed with a synthetic  
521 self-oscillating VF model in a hemilaryngeal orientation. The key oscillation features of the  
522 model such as frequency, open quotient, speed quotient, and glottal distance, were found  
523 to have physiologically-relevant values. Therefore, it was deemed a suitable surrogate for  
524 investigating the intraglottal pressure distribution.

525 The intraglottal pressure distribution was found to be highly dependent on unsteady  
526 and three-dimensional effects. Unsteady flow effects were reflected in the intraglottal gauge  
527 pressure becoming negative during the later stages of VF opening, a feature not captured  
528 by prior static VF, steady-flow investigations. This influenced the energy exchange process,  
529 decreasing the total amount of energy transferred from the fluid to the VF during the opening  
530 phase.

531 The net aerodynamic energy transfer of the fluid to the structure was also positive dur-  
532 ing the closing phase, although it was less positive than during opening, thereby satisfying  
533 the theory of energy exchange necessary for successful VF oscillation<sup>5</sup>. Immediately pre-  
534 ceding VF closure, the energy exchange decreased precipitously as the intraglottal pressure  
535 increased due to viscous losses through the narrowing glottal aperture.

536 Significant variations in the intraglottal aerodynamic pressure were observed between the  
537 midline, and the anterior locations along the VF surface. Similarly, the aerodynamic energy  
538 transfer varied in the anterior-posterior direction with over 80% of the aerodynamic energy  
539 transfer occurring over the middle third of the VF surface. This supports the idea that VF

540 damage occurs along the middle third of the VF length due to the increased dissipation of  
541 energy within this region.

542 Future work aims to use a similar approach to that employed herein to measure intraglot-  
543 tal pressure distributions during the collision phase of the VF in order to improve estimations  
544 of collision dose, thereby better predicting VF damage.

#### 545 **ACKNOWLEDGMENTS**

546 This research was supported by the National Institutes of Health (NIH) National Institute  
547 on Deafness and other Communication Disorders Grant P50 DC015446. The content is solely  
548 the responsibility of the authors and does not necessarily represent the official views of the  
549 National Institutes of Health.

#### 550 **REFERENCES**

551 <sup>1</sup>R. Wegel, “Theory of vibration of the larynx 1,” *Bell System Technical Journal* **9**(1),  
552 207–227 (1930).

553 <sup>2</sup>J. Van den Berg, J. Zantema, and P. Doornenbal Jr, “On the air resistance and the  
554 bernoulli effect of the human larynx,” *The journal of the acoustical society of America*  
555 **29**(5), 626–631 (1957).

556 <sup>3</sup>S. L. Thomson, L. Mongeau, and S. H. Frankel, “Aerodynamic transfer of energy to the  
557 vocal folds,” *The Journal of the Acoustical Society of America* **118**(3), 1689–1700 (2005).

558 <sup>4</sup>I. R. Titze, “Mean intraglottal pressure in vocal fold oscillation,” *Journal of Phonetics*  
559 **14**(3-4), 359–364 (1986).

560 <sup>5</sup>I. R. Titze, “The physics of small-amplitude oscillation of the vocal folds,” *The Journal of*  
561 *the Acoustical Society of America* **83**(4), 1536–1552 (1988).

562 <sup>6</sup>X. Pelorson, A. Hirschberg, A. Wijnands, and H. Bailliet, “Description of the flow through  
563 in-vitro models of the glottis during phonation,” *Acta acustica* **3**, 191–202 (1995).

564 <sup>7</sup>A. Hirschberg, X. Pelorson, G. Hofmans, R. Van Hassel, and A. Wijnands, “Starting  
565 transient of the flow through an in-vitro model of the vocal folds,” in *Vocal fold physiology:*  
566 *Controlling complexity and chaos* (Singular Publishing Group, 1996), pp. 31–46.

567 <sup>8</sup>G. Hofmans, G. Groot, M. Ranucci, G. Graziani, and A. Hirschberg, “Unsteady flow  
568 through in-vitro models of the glottis,” *The Journal of the Acoustical Society of America*  
569 **113**(3), 1658–1675 (2003).

570 <sup>9</sup>M. Triep, C. Brücker, and W. Schröder, “High-speed piv measurements of the flow down-  
571 stream of a dynamic mechanical model of the human vocal folds,” *Experiments in Fluids*  
572 **39**(2), 232–245 (2005).

573 <sup>10</sup>B. D. Erath and M. W. Plesniak, “An investigation of bimodal jet trajectory in flow  
574 through scaled models of the human vocal tract,” *Experiments in Fluids* **40**(5), 683 (2006).

575 <sup>11</sup>B. D. Erath and M. W. Plesniak, “The occurrence of the coanda effect in pulsatile flow  
576 through static models of the human vocal folds,” *The Journal of the Acoustical Society of*  
577 *America* **120**(2), 1000–1011 (2006).

578 <sup>12</sup>B. D. Erath and M. W. Plesniak, “An investigation of jet trajectory in flow through scaled  
579 vocal fold models with asymmetric glottal passages,” *Experiments in fluids* **41**(5), 735–748  
580 (2006).

581 <sup>13</sup>B. D. Erath and M. W. Plesniak, “Viscous flow features in scaled-up physical models of  
582 normal and pathological vocal phonation,” *International journal of heat and fluid flow*  
583 **31**(3), 468–481 (2010).

584 <sup>14</sup>B. D. Erath and M. W. Plesniak, “An investigation of asymmetric flow features in a  
585 scaled-up driven model of the human vocal folds,” *Experiments in Fluids* **49**(1), 131–146  
586 (2010).

587 <sup>15</sup>L. Mongeau, N. Francheck, C. H. Coker, and R. A. Kubli, “Characteristics of a pulsating  
588 jet through a small modulated orifice, with application to voice production,” *The Journal*  
589 *of the Acoustical Society of America* **102**(2), 1121–1133 (1997).

590 <sup>16</sup>J. B. Park and L. Mongeau, “Experimental investigation of the influence of a posterior  
591 gap on glottal flow and sound,” *The Journal of the Acoustical Society of America* **124**(2),  
592 1171–1179 (2008).

593 <sup>17</sup>F. Alipour and R. C. Scherer, “Pulsatile airflow during phonation: An excised larynx  
594 model,” *The Journal of the Acoustical Society of America* **97**(2), 1241–1248 (1995).

595 <sup>18</sup>F. Alipour, R. Scherer, and V. Patel, “An experimental study of pulsatile flow in canine  
596 larynges,” *Journal of Fluids Engineering* **117**(4), 577–581 (1995).

597 <sup>19</sup>G. S. Berke, D. M. Moore, P. A. Monkewitz, D. G. Hanson, and B. R. Gerratt, “A  
598 preliminary study of particle velocity during phonation in an in vivo canine model,” *Journal*

599 of Voice **3**(4), 306–313 (1989).

600 <sup>20</sup>L. Oren, S. Khosla, and E. Gutmark, “Intraglottal geometry and velocity measurements  
601 in canine larynges,” *The Journal of the Acoustical Society of America* **135**(1), 380–388  
602 (2014).

603 <sup>21</sup>F. Alipour, D. A. Berry, and I. R. Titze, “A finite-element model of vocal-fold vibration,”  
604 *The Journal of the Acoustical Society of America* **108**(6), 3003–3012 (2000).

605 <sup>22</sup>F. Alipour and R. C. Scherer, “Flow separation in a computational oscillating vocal fold  
606 model,” *The Journal of the Acoustical Society of America* **116**(3), 1710–1719 (2004).

607 <sup>23</sup>G. Z. Decker and S. L. Thomson, “Computational simulations of vocal fold vibration:  
608 Bernoulli versus navier–stokes,” *Journal of Voice* **21**(3), 273–284 (2007).

609 <sup>24</sup>C. Zhang, W. Zhao, S. H. Frankel, and L. Mongeau, “Computational aeroacoustics of  
610 phonation, part ii: Effects of flow parameters and ventricular folds,” *The Journal of the*  
611 *Acoustical Society of America* **112**(5), 2147–2154 (2002).

612 <sup>25</sup>W. Zhao, S. Frankel, and L. Mongeau, “Numerical simulations of sound from confined  
613 pulsating axisymmetric jets,” *AIAA journal* **39**(10), 1868–1874 (2001).

614 <sup>26</sup>W. Zhao, C. Zhang, S. H. Frankel, and L. Mongeau, “Computational aeroacoustics of  
615 phonation, part i: Computational methods and sound generation mechanisms,” *The Jour-*  
616 *nal of the Acoustical Society of America* **112**(5), 2134–2146 (2002).

617 <sup>27</sup>X. Zheng, Q. Xue, R. Mittal, and S. Beilamowicz, “A coupled sharp-interface immersed  
618 boundary-finite-element method for flow-structure interaction with application to human  
619 phonation,” *Journal of biomechanical engineering* **132**(11) (2010).

620 <sup>28</sup>X. Zheng, R. Mittal, and S. Bielamowicz, “A computational study of asymmetric glottal  
621 jet deflection during phonation,” *The Journal of the Acoustical Society of America* **129**(4),  
622 2133–2143 (2011).

623 <sup>29</sup>X. Zheng, R. Mittal, Q. Xue, and S. Bielamowicz, “Direct-numerical simulation of the  
624 glottal jet and vocal-fold dynamics in a three-dimensional laryngeal model,” *The Journal*  
625 *of the Acoustical Society of America* **130**(1), 404–415 (2011).

626 <sup>30</sup>R. Mittal, B. D. Erath, and M. W. Plesniak, “Fluid dynamics of human phonation and  
627 speech,” *Annual Review of Fluid Mechanics* **45**, 437–467 (2013).

628 <sup>31</sup>N. Binh and J. Gauffin, “Aerodynamic measurements in an enlarged static laryngeal  
629 model,” *STL-QPSR* **24**(2-3), 1 (1983).

630 <sup>32</sup>R. C. Scherer and C.-g. Guo, “Laryngeal modeling: Translaryngeal pressure for a model  
631 with many glottal shapes,” in *First International Conference on Spoken Language Pro-*  
632 *cessing* (1990).

633 <sup>33</sup>R. C. Scherer, D. Shinwari, K. J. De Witt, C. Zhang, B. R. Kucinski, and A. A. Afjeh,  
634 “Intraglottal pressure profiles for a symmetric and oblique glottis with a divergence angle  
635 of 10 degrees,” *The Journal of the Acoustical Society of America* **109**(4), 1616–1630 (2001).

636 <sup>34</sup>R. C. Scherer, D. Shinwari, K. J. De Witt, C. Zhang, B. R. Kucinski, and A. A. Afjeh,  
637 “Intraglottal pressure distributions for a symmetric and oblique glottis with a uniform  
638 duct (I),” *The Journal of the Acoustical Society of America* **112**(4), 1253–1256 (2002).

639 <sup>35</sup>S. Li, R. C. Scherer, M. Wan, S. Wang, and H. Wu, “The effect of glottal angle on  
640 intraglottal pressure,” *The Journal of the Acoustical Society of America* **119**(1), 539–548

641 (2006).

642 <sup>36</sup>S. Li, R. C. Scherer, M. Wan, S. Wang, and H. Wu, “Numerical study of the effects of  
643 inferior and superior vocal fold surface angles on vocal fold pressure distributions,” *The*  
644 *Journal of the Acoustical Society of America* **119**(5), 3003–3010 (2006).

645 <sup>37</sup>S. Li, R. C. Scherer, M. Wan, S. Wang, and B. Song, “Intraglottal pressure: a comparison  
646 between male and female larynxes,” *Journal of Voice* (2019).

647 <sup>38</sup>S. Li, R. C. Scherer, M. Wan, and S. Wang, “The effect of entrance radii on intraglottal  
648 pressure distributions in the divergent glottis,” *The Journal of the Acoustical Society of*  
649 *America* **131**(2), 1371–1377 (2012).

650 <sup>39</sup>L. P. Fulcher, R. C. Scherer, and T. Powell, “Pressure distributions in a static physical  
651 model of the uniform glottis: Entrance and exit coefficients,” *The Journal of the Acoustical*  
652 *Society of America* **129**(3), 1548–1553 (2011).

653 <sup>40</sup>R. C. Scherer, K. J. De Witt, and B. R. Kucinski, “The effect of exit radii on intraglottal  
654 pressure distributions in the convergent glottis,” *The Journal of the Acoustical Society of*  
655 *America* **110**(5), 2267–2269 (2001).

656 <sup>41</sup>K. Ishizaka and J. L. Flanagan, “Synthesis of voiced sounds from a two-mass model of the  
657 vocal cords,” *Bell system technical journal* **51**(6), 1233–1268 (1972).

658 <sup>42</sup>J. B. Park and L. Mongeau, “Instantaneous orifice discharge coefficient of a physical, driven  
659 model of the human larynx,” *The Journal of the Acoustical Society of America* **121**(1),  
660 442–455 (2007).

- 661 <sup>43</sup>M. H. Krane, M. Barry, and T. Wei, “Dynamics of temporal variations in phonatory flow,”  
662 The Journal of the Acoustical Society of America **128**(1), 372–383 (2010).
- 663 <sup>44</sup>C. Vilain, X. Pelorson, C. Fraysse, M. Deverge, A. Hirschberg, and J. Willems, “Exper-  
664 imental validation of a quasi-steady theory for the flow through the glottis,” Journal of  
665 sound and vibration **276**(3-5), 475–490 (2004).
- 666 <sup>45</sup>P. Šidlof, O. Doaré, O. Cadot, and A. Chaigne, “Measurement of flow separation in a  
667 human vocal folds model,” Experiments in fluids **51**(1), 123–136 (2011).
- 668 <sup>46</sup>L. Oren, S. Khosla, and E. Gutmark, “Intraglottal pressure distribution computed from  
669 empirical velocity data in canine larynx,” Journal of biomechanics **47**(6), 1287–1293  
670 (2014).
- 671 <sup>47</sup>L. Oren, E. Gutmark, and S. Khosla, “Intraglottal velocity and pressure measurements in  
672 a hemilarynx model,” The Journal of the Acoustical Society of America **137**(2), 935–943  
673 (2015).
- 674 <sup>48</sup>A. Pirnia, E. A. Browning, S. D. Peterson, and B. D. Erath, “Discrete and periodic vortex  
675 loading on a flexible plate; application to energy harvesting and voiced speech production,”  
676 Journal of Sound and Vibration **433**, 476–492 (2018).
- 677 <sup>49</sup>J. S. Drechsel and S. L. Thomson, “Influence of supraglottal structures on the glottal  
678 jet exiting a two-layer synthetic, self-oscillating vocal fold model,” The Journal of the  
679 Acoustical Society of America **123**(6), 4434–4445 (2008).
- 680 <sup>50</sup>S. Khosla, S. Muruguppan, E. Gutmark, and R. Scherer, “Vortical flow field during phona-  
681 tion in an excised canine larynx model,” Annals of Otology, Rhinology & Laryngology



682 **116**(3), 217–228 (2007).

683 <sup>51</sup>B. D. Erath, S. D. Peterson, M. Zañartu, G. R. Wodicka, and M. W. Plesniak, “A the-  
684 oretical model of the pressure field arising from asymmetric intraglottal flows applied to  
685 a two-mass model of the vocal folds,” *The Journal of the Acoustical Society of America*  
686 **130**(1), 389–403 (2011).

687 <sup>52</sup>B. D. Erath, S. D. Peterson, M. Zañartu, G. R. Wodicka, K. C. Stewart, and M. W. Ples-  
688 niak, “Response to “comments on ‘a theoretical model of the pressure distributions arising  
689 from asymmetric intraglottal flows applied to a two-mass model of the vocal folds””[j.  
690 acoust. soc. am. 130, 389–403 (2011)],” *The Journal of the Acoustical Society of America*  
691 **134**(2), 913–916 (2013).

692 <sup>53</sup>B. D. Erath, S. D. Peterson, K. S. Weiland, M. W. Plesniak, and M. Zañartu, “An acoustic  
693 source model for asymmetric intraglottal flow with application to reduced-order models of  
694 the vocal folds,” *PloS one* **14**(7), e0219914 (2019).

695 <sup>54</sup>X. Zheng, J. Seo, V. Vedula, T. Abraham, and R. Mittal, “Computational modeling and  
696 analysis of intracardiac flows in simple models of the left ventricle,” *European Journal of*  
697 *Mechanics-B/Fluids* **35**, 31–39 (2012).

698 <sup>55</sup>Q. Xue, X. Zheng, R. Mittal, and S. Bielamowicz, “Computational study of effects of  
699 tension imbalance on phonation in a three-dimensional tubular larynx model,” *Journal of*  
700 *Voice* **28**(4), 411–419 (2014).

701 <sup>56</sup>R. C. Scherer, S. Torkaman, B. R. Kucinski, and A. A. Afjeh, “Intraglottal pressures  
702 in a three-dimensional model with a non-rectangular glottal shape,” *The Journal of the*

- 703 Acoustical Society of America **128**(2), 828–838 (2010).
- 704 <sup>57</sup>F. Alipour and R. C. Scherer, “Dynamic glottal pressures in an excised hemilarynx model,”  
705 Journal of Voice **14**(4), 443–454 (2000).
- 706 <sup>58</sup>P. Bhattacharya and T. Siegmund, “Validation of a flow–structure–interaction computation  
707 model of phonation,” Journal of fluids and structures **48**, 169–187 (2014).
- 708 <sup>59</sup>C. F. de Luzan, L. Oren, E. Gutmark, and S. M. Khosla, “Quantification of the intraglottal  
709 pressure induced by flow separation vortices using large eddy simulation,” Journal of Voice  
710 (2020).
- 711 <sup>60</sup>M. Motie-Shirazi, M. Zañartu, S. D. Peterson, D. D. Mehta, J. B. Kobler, R. E. Hillman,  
712 and B. D. Erath, “Toward development of a vocal fold contact pressure probe: sensor  
713 characterization and validation using synthetic vocal fold models,” Applied Sciences **9**(15),  
714 3002 (2019).
- 715 <sup>61</sup>B. H. Story, “Comparison of magnetic resonance imaging-based vocal tract area functions  
716 obtained from the same speaker in 1994 and 2002,” The Journal of the Acoustical Society  
717 of America **123**(1), 327–335 (2008).
- 718 <sup>62</sup>R. W. Chan and M. L. Rodriguez, “A simple-shear rheometer for linear viscoelastic char-  
719 acterization of vocal fold tissues at phonatory frequencies,” The Journal of the Acoustical  
720 Society of America **124**(2), 1207–1219 (2008).
- 721 <sup>63</sup>K. A. Stevens, “Geometry and material properties of vocal fold models [MS thesis],”  
722 Brigham Young University (2015).

723 <sup>64</sup>R. E. Kania, S. Hans, D. M. Hartl, P. Clement, L. Crevier-Buchman, and D. F. Brasnu,  
724 “Variability of electroglottographic glottal closed quotients: necessity of standardization  
725 to obtain normative values,” *Archives of Otolaryngology–Head & Neck Surgery* **130**(3),  
726 349–352 (2004).

727 <sup>65</sup>J. Lohscheller, J. G. Švec, and M. Döllinger, “Vocal fold vibration amplitude, open quo-  
728 tient, speed quotient and their variability along glottal length: kymographic data from  
729 normal subjects,” *Logopedics Phoniatrics Vocology* **38**(4), 182–192 (2013).

730 <sup>66</sup>J. J. Jiang, Y. Zhang, M. P. Kelly, E. T. Bieging, and M. R. Hoffman, “An automatic  
731 method to quantify mucosal waves via videokymography,” *The Laryngoscope* **118**(8),  
732 1504–1510 (2008).

733 <sup>67</sup>R. J. Baken and R. F. Orlikoff, *Clinical measurement of speech and voice* (Cengage Learn-  
734 ing, 2000).

735 <sup>68</sup>D. D. Mehta, J. B. Kobler, S. M. Zeitels, M. Zañartu, B. D. Erath, M. Motie-Shirazi, S. D.  
736 Peterson, R. H. Petrillo, and R. E. Hillman, “Toward development of a vocal fold contact  
737 pressure probe: Bench-top validation of a dual-sensor probe using excised human larynx  
738 models,” *Applied Sciences* **9**(20), 4360 (2019).

739 <sup>69</sup>J. J. Jiang and I. R. Titze, “Measurement of vocal fold intraglottal pressure and impact  
740 stress,” *J. Voice* **8**, 132–144 (1994).

741 <sup>70</sup>M. Doellinger and D. A. Berry, “Visualization and quantification of the medial surface  
742 dynamics of an excised human vocal fold during phonation,” *Journal of Voice* **20**(3), 401–  
743 413 (2006).

744 <sup>71</sup>I. R. Titze and F. Alipour, *The myoelastic aerodynamic theory of phonation* (National  
745 Center for Voice and Speech, 2006).

746 <sup>72</sup>See Supplementary materials at [URL will be inserted by AIP] for a video showing the  
747 progression of the intraglottal pressure distribution.

748 <sup>73</sup>L. P. Fulcher, R. C. Scherer, K. J. De Witt, P. Thapa, Y. Bo, and B. R. Kucinski,  
749 “Pressure distributions in a static physical model of the hemilarynx: measurements and  
750 computations,” *Journal of Voice* **24**(1), 2–20 (2010).

751 <sup>74</sup>M. Zañartu, G. E. Galindo, B. D. Erath, S. D. Peterson, G. R. Wodicka, and R. E.  
752 Hillman, “Modeling the effects of a posterior glottal opening on vocal fold dynamics with  
753 implications for vocal hyperfunction,” *The Journal of the Acoustical Society of America*  
754 **136**(6), 3262–3271 (2014).

755 <sup>75</sup>I. R. Titze, J. G. Svec, and P. S. Popolo, “Vocal dose measures,” *Journal of Speech,*  
756 *Language, and Hearing Research* (2003).

757 <sup>76</sup>I. R. Titze and E. J. Hunter, “Comparison of vocal vibration-dose measures for potential-  
758 damage risk criteria,” *Journal of Speech, Language, and Hearing Research* **58**(5), 1425–  
759 1439 (2015).

760 <sup>77</sup>F. G. Dikkers and P. G. Nikkels, “Benign lesions of the vocal folds: histopathology and  
761 phonotrauma,” *Annals of Otology, Rhinology & Laryngology* **104**(9), 698–703 (1995).

762 <sup>78</sup>B. D. Erath, M. Zañartu, K. C. Stewart, M. W. Plesniak, D. E. Sommer, and S. D.  
763 Peterson, “A review of lumped-element models of voiced speech,” *Speech Communication*  
764 **55**(5), 667–690 (2013).

765 <sup>79</sup>K. Comley and N. Fleck, “The compressive response of porcine adipose tissue from low to  
766 high strain rate,” *International Journal of Impact Engineering* **46**, 1–10 (2012).

767 <sup>80</sup>Y. B. Min, I. R. Titze, and F. Alipour-Haghighi, “Stress-strain response of the human  
768 vocal ligament,” *Annals of Otology, Rhinology & Laryngology* **104**(7), 563–569 (1995).

769 <sup>81</sup>D. K. Chhetri, Z. Zhang, and J. Neubauer, “Measurement of young’s modulus of vocal  
770 folds by indentation,” *J. Voice* **25**, 1–7 (2011).

771 <sup>82</sup>G. R. Dion, P. G. Coelho, S. Teng, M. N. Janal, M. R. Amin, and R. C. Branski, “Dynamic  
772 nanomechanical analysis of the vocal fold structure in excised larynges,” *The Laryngoscope*  
773 **127**(7), E225–E230 (2017).

774 <sup>83</sup>F. Alipour and S. Vigmostad, “Measurement of vocal folds elastic properties for continuum  
775 modeling,” *Journal of Voice* **26**(6), 816–e21 (2012).

776 <sup>84</sup>R. W. Chan and I. R. Titze, “Viscoelastic shear properties of human vocal fold mucosa:  
777 Measurement methodology and empirical results,” *J. Acoust. Soc. Am.* **106**, 2008–2021  
778 (1999).

779 <sup>85</sup>R. W. Chan, M. Fu, L. Young, and N. Tirunagari, “Relative contributions of collagen  
780 and elastin to elasticity of the vocal fold under tension,” *Annals of biomedical engineering*  
781 **35**(8), 1471–1483 (2007).

782 <sup>86</sup>L. Oren, D. Dembinski, E. Gutmark, and S. Khosla, “Characterization of the vocal fold  
783 vertical stiffness in a canine model,” *Journal of Voice* **28**(3), 297–304 (2014).
